# Supplementary material for: Ancient DNA reveals the lost domestication history of South American camelids in Northern Chile and across the Andes
Source: eLife journal article supplement (doi:10.7554/elife.63390), 2021-03-16
Supplement: supp [file elife_poa_e63390_Figure_3_figure_supplement_1.pdf › elife_poa_e63390_Figure_3_figure_supplement_1.pdf]

mapDamage plot for library 'ACTGA'

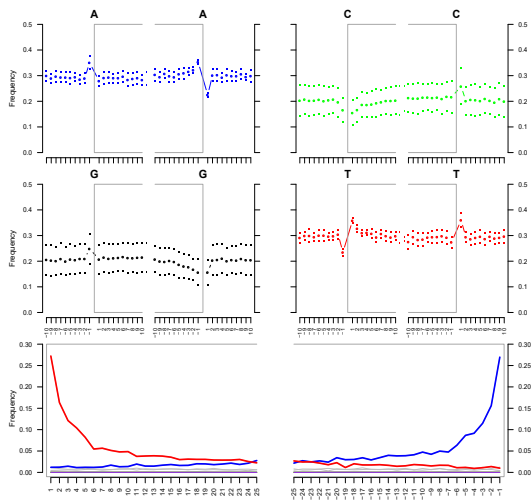

TU-54 C55

mapDamage plot for library 'TTGAAC'

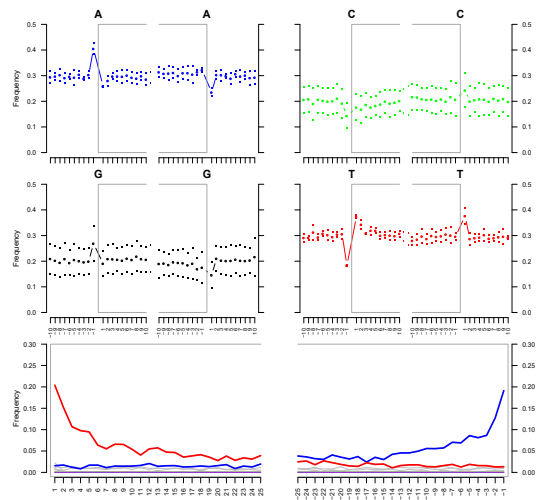

TU-85 C36

mapDamage plot for library 'ACGTGC'

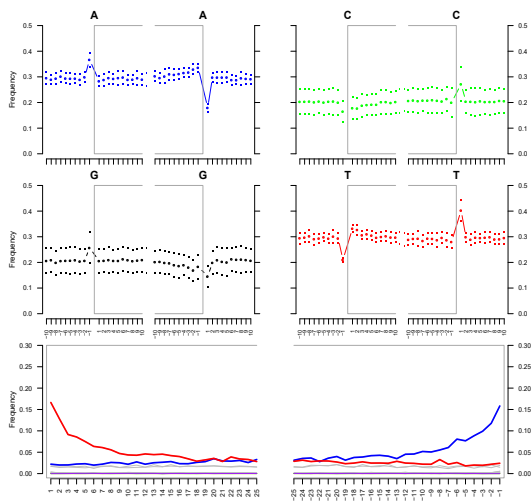

TU-54 C34

mapDamage plot for library 'GACGAC'

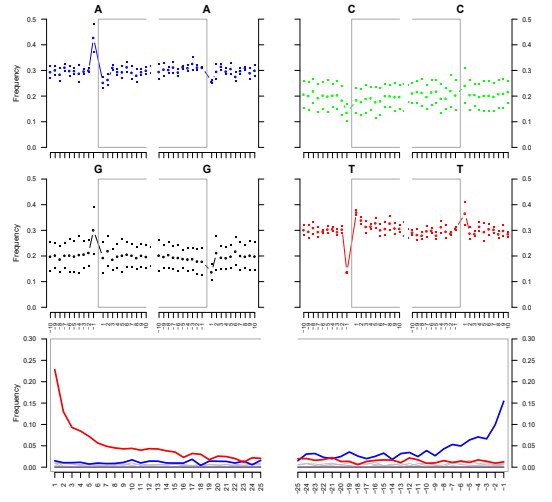

TU-85 C6

mapDamage plot for library 'TGAGCC'

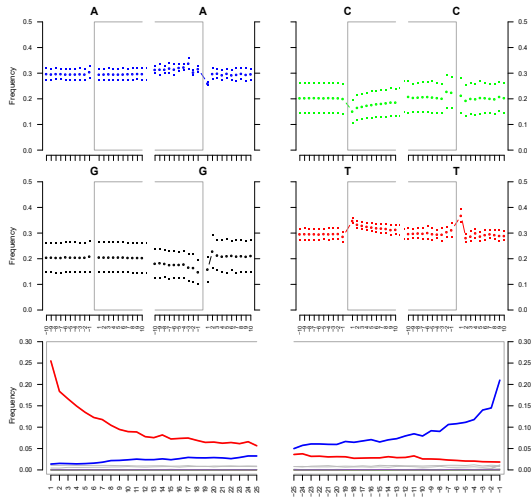

TU-52 C46

mapDamage plot for library 'TTAGGC'

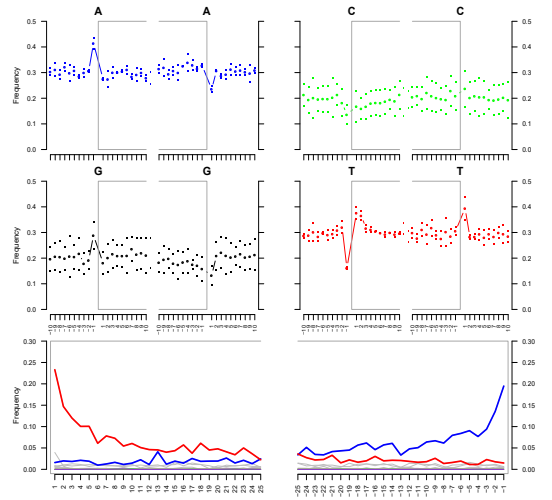

TU-94 C52
