# Supplementary material for: Ancient DNA reveals the lost domestication history of South American camelids in Northern Chile and across the Andes
Source: eLife. 2021 Mar 16;10:e63390. doi: 10.7554/eLife.63390 (PMC8032396; doi:10.7554/eLife.63390)
Supplement: Supplementary file 2. [file elife-63390-supp2.xlsx]

## Sheet: Sheet1
year	Sample	DataSet Title	GenBank accession number	Author
2021	C10mito	BankIt2325854	MT254135	Paloma Díaz-Maroto
2021	C11mito	BankIt2325854	MT254136	Paloma Díaz-Maroto
2021	C12mito	BankIt2325854	MT254137	Paloma Díaz-Maroto
2021	c13mito	BankIt2325854	MT254138	Paloma Díaz-Maroto
2021	C14mito	BankIt2325854	MT254139	Paloma Díaz-Maroto
2021	C15mito	BankIt2325854	MT254140	Paloma Díaz-Maroto
2021	C16mito	BankIt2325854	MT254141	Paloma Díaz-Maroto
2021	C18mito	BankIt2325854	MT254142	Paloma Díaz-Maroto
2021	c1mito	BankIt2325854	MT254143	Paloma Díaz-Maroto
2021	C20mito	BankIt2325854	MT254144	Paloma Díaz-Maroto
2021	C21mito	BankIt2325854	MT254145	Paloma Díaz-Maroto
2021	C22mito	BankIt2325854	MT254146	Paloma Díaz-Maroto
2021	C24mito	BankIt2325854	MT254147	Paloma Díaz-Maroto
2021	C25mito	BankIt2325854	MT254148	Paloma Díaz-Maroto
2021	C27mito	BankIt2325854	MT254149	Paloma Díaz-Maroto
2021	C28mito	BankIt2325854	MT254150	Paloma Díaz-Maroto
2021	C29mito	BankIt2325854	MT254151	Paloma Díaz-Maroto
2021	C30mito	BankIt2325854	MT254152	Paloma Díaz-Maroto
2021	C31mito	BankIt2325854	MT254153	Paloma Díaz-Maroto
2021	C32mito	BankIt2325854	MT254154	Paloma Díaz-Maroto
2021	C33mito	BankIt2325854	MT254155	Paloma Díaz-Maroto
2021	C34mito	BankIt2325854	MT254156	Paloma Díaz-Maroto
2021	C35mito	BankIt2325854	MT254157	Paloma Díaz-Maroto
2021	C36mito	BankIt2325854	MT254158	Paloma Díaz-Maroto
2021	C37mito	BankIt2325854	MT254159	Paloma Díaz-Maroto
2021	C38mito	BankIt2325854	MT254160	Paloma Díaz-Maroto
2021	C39mito	BankIt2325854	MT254161	Paloma Díaz-Maroto
2021	C41mito	BankIt2325854	MT254162	Paloma Díaz-Maroto
2021	C42mito	BankIt2325854	MT254163	Paloma Díaz-Maroto
2021	C43mito	BankIt2325854	MT254164	Paloma Díaz-Maroto
2021	C44mito	BankIt2325854	MT254165	Paloma Díaz-Maroto
2021	C46mito	BankIt2325854	MT254166	Paloma Díaz-Maroto
2021	C47mito	BankIt2325854	MT254167	Paloma Díaz-Maroto
2021	C48mito	BankIt2325854	MT254168	Paloma Díaz-Maroto
2021	C49mito	BankIt2325854	MT254169	Paloma Díaz-Maroto
2021	C50mito	BankIt2325854	MT254170	Paloma Díaz-Maroto
2021	C52mito	BankIt2325854	MT254171	Paloma Díaz-Maroto
2021	C54mito	BankIt2325854	MT254172	Paloma Díaz-Maroto
2021	C55mito	BankIt2325854	MT254173	Paloma Díaz-Maroto
2021	C57mito	BankIt2325854	MT254174	Paloma Díaz-Maroto
2021	C59mito	BankIt2325854	MT254175	Paloma Díaz-Maroto
2021	C5mito	BankIt2325854	MT254176	Paloma Díaz-Maroto
2021	C60mito	BankIt2325854	MT254177	Paloma Díaz-Maroto
2021	C61mito	BankIt2325854	MT254178	Paloma Díaz-Maroto
2021	C62mito	BankIt2325854	MT254179	Paloma Díaz-Maroto
2021	C63mito	BankIt2325854	MT254180	Paloma Díaz-Maroto
2021	C64mito	BankIt2325854	MT254181	Paloma Díaz-Maroto
2021	C65mito	BankIt2325854	MT254182	Paloma Díaz-Maroto
2021	C66mito	BankIt2325854	MT254183	Paloma Díaz-Maroto
2021	C67mito	BankIt2325854	MT254184	Paloma Díaz-Maroto
2021	C68mito	BankIt2325854	MT254185	Paloma Díaz-Maroto
2021	C69mito	BankIt2325854	MT254186	Paloma Díaz-Maroto
2021	C6mito	BankIt2325854	MT254187	Paloma Díaz-Maroto
2021	C70mito	BankIt2325854	MT254188	Paloma Díaz-Maroto
2021	C71mito	BankIt2325854	MT254189	Paloma Díaz-Maroto
2021	C72mito	BankIt2325854	MT254190	Paloma Díaz-Maroto
2021	C73mito	BankIt2325854	MT254191	Paloma Díaz-Maroto
2021	C74mito	BankIt2325854	MT254192	Paloma Díaz-Maroto
2021	C75mito	BankIt2325854	MT254193	Paloma Díaz-Maroto
2021	C76mito	BankIt2325854	MT254194	Paloma Díaz-Maroto
2021	C77mito	BankIt2325854	MT254195	Paloma Díaz-Maroto
