# Supplementary figures and images for: Ancient DNA reveals the lost domestication history of South American camelids in Northern Chile and across the Andes
Source: eLife journal article supplement (doi:10.7554/elife.63390), 2021-03-16

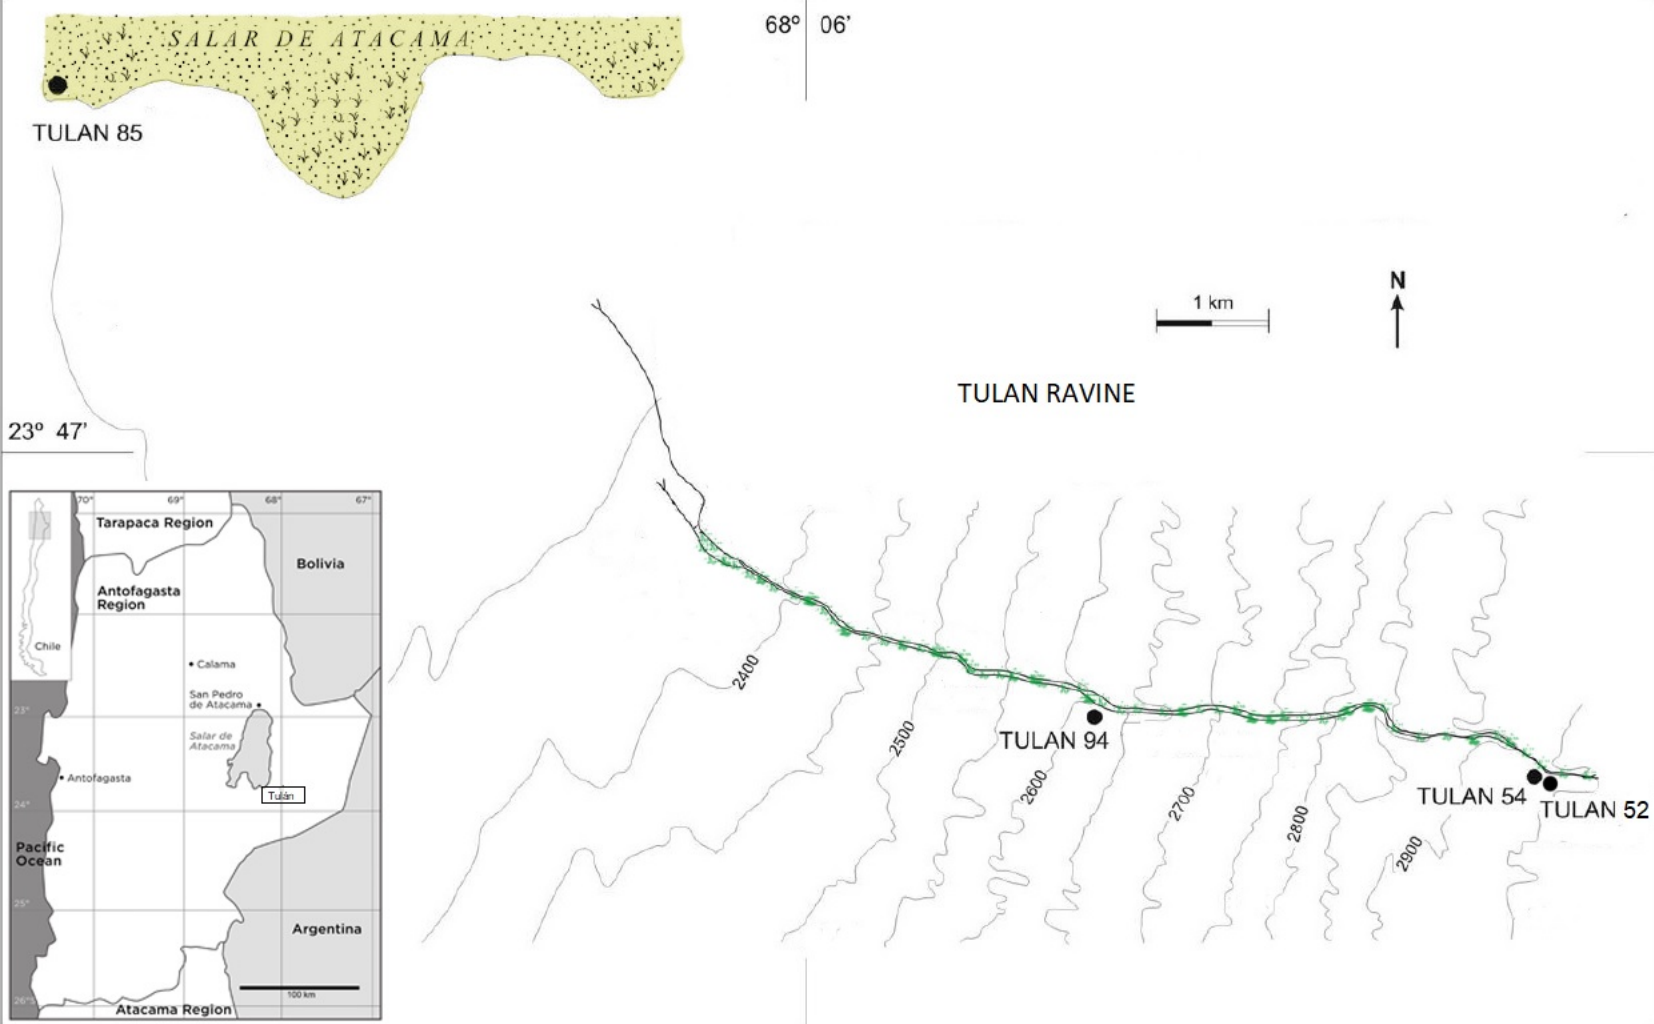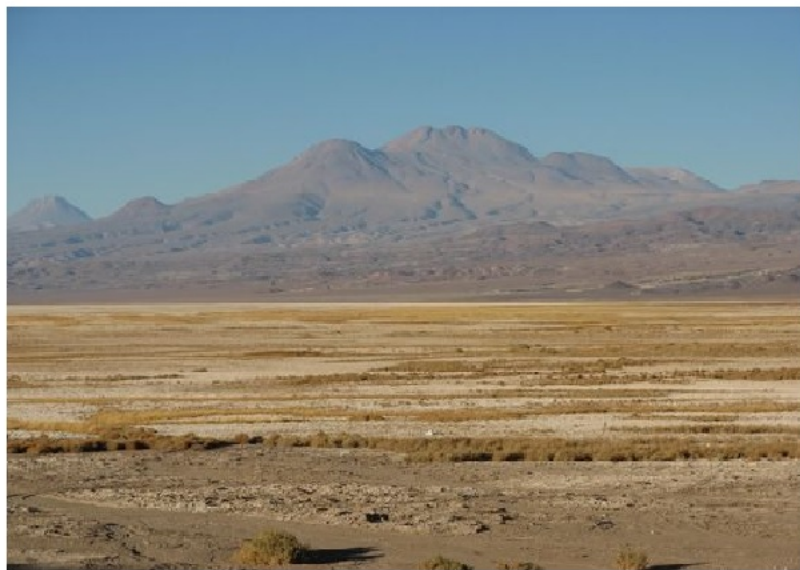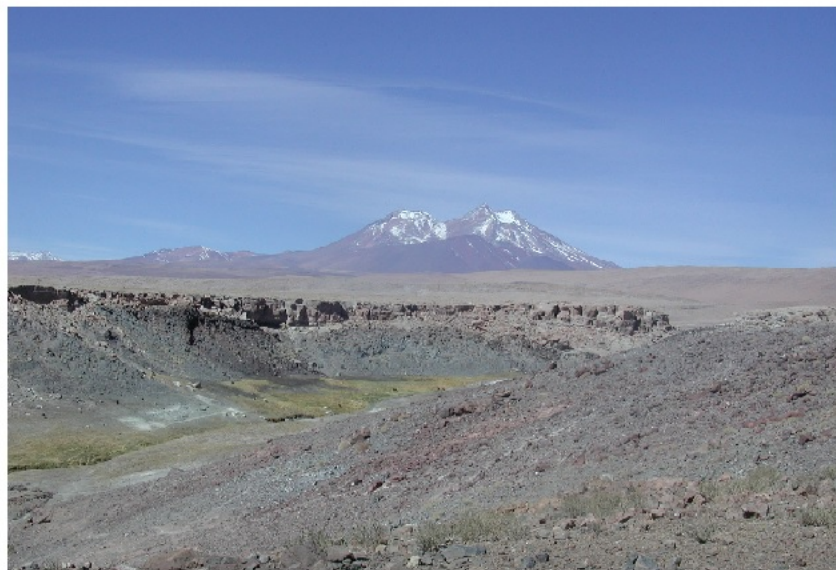

Supplement: supp [file elife_poa_e63390_Figure_1_figure_supplement_1.pdf › elife_poa_e63390_Figure_1_figure_supplement_1.pdf]

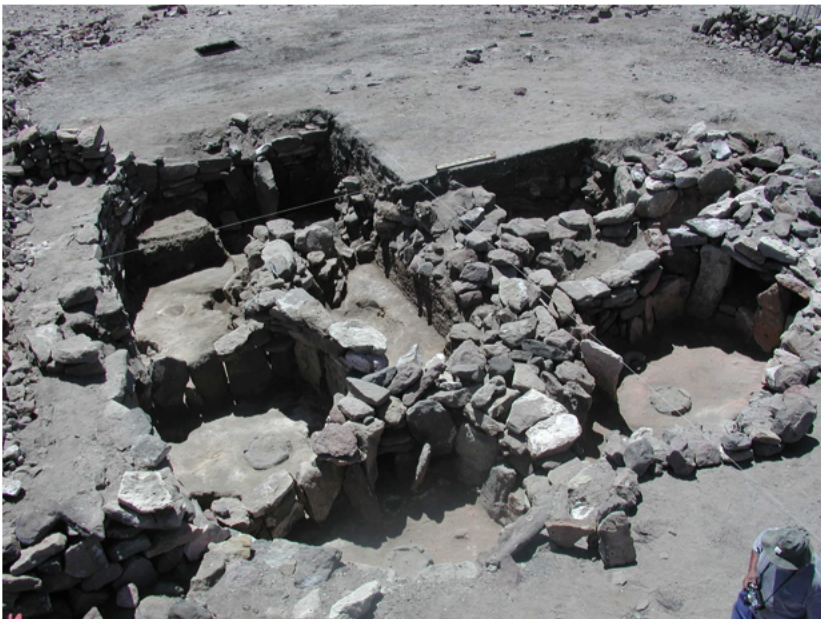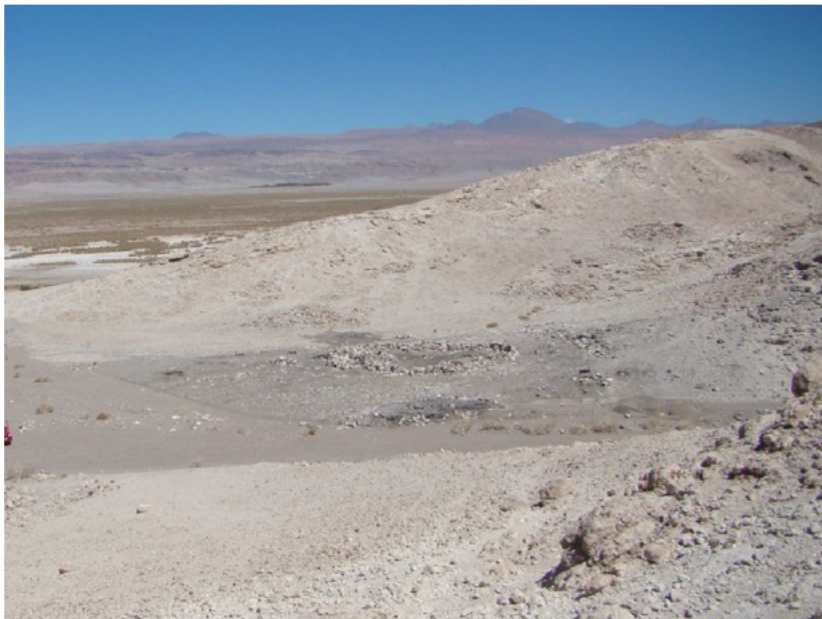

Supplement: supp [file elife_poa_e63390_Figure_1_figure_supplement_2.pdf › elife_poa_e63390_Figure_1_figure_supplement_2.pdf]

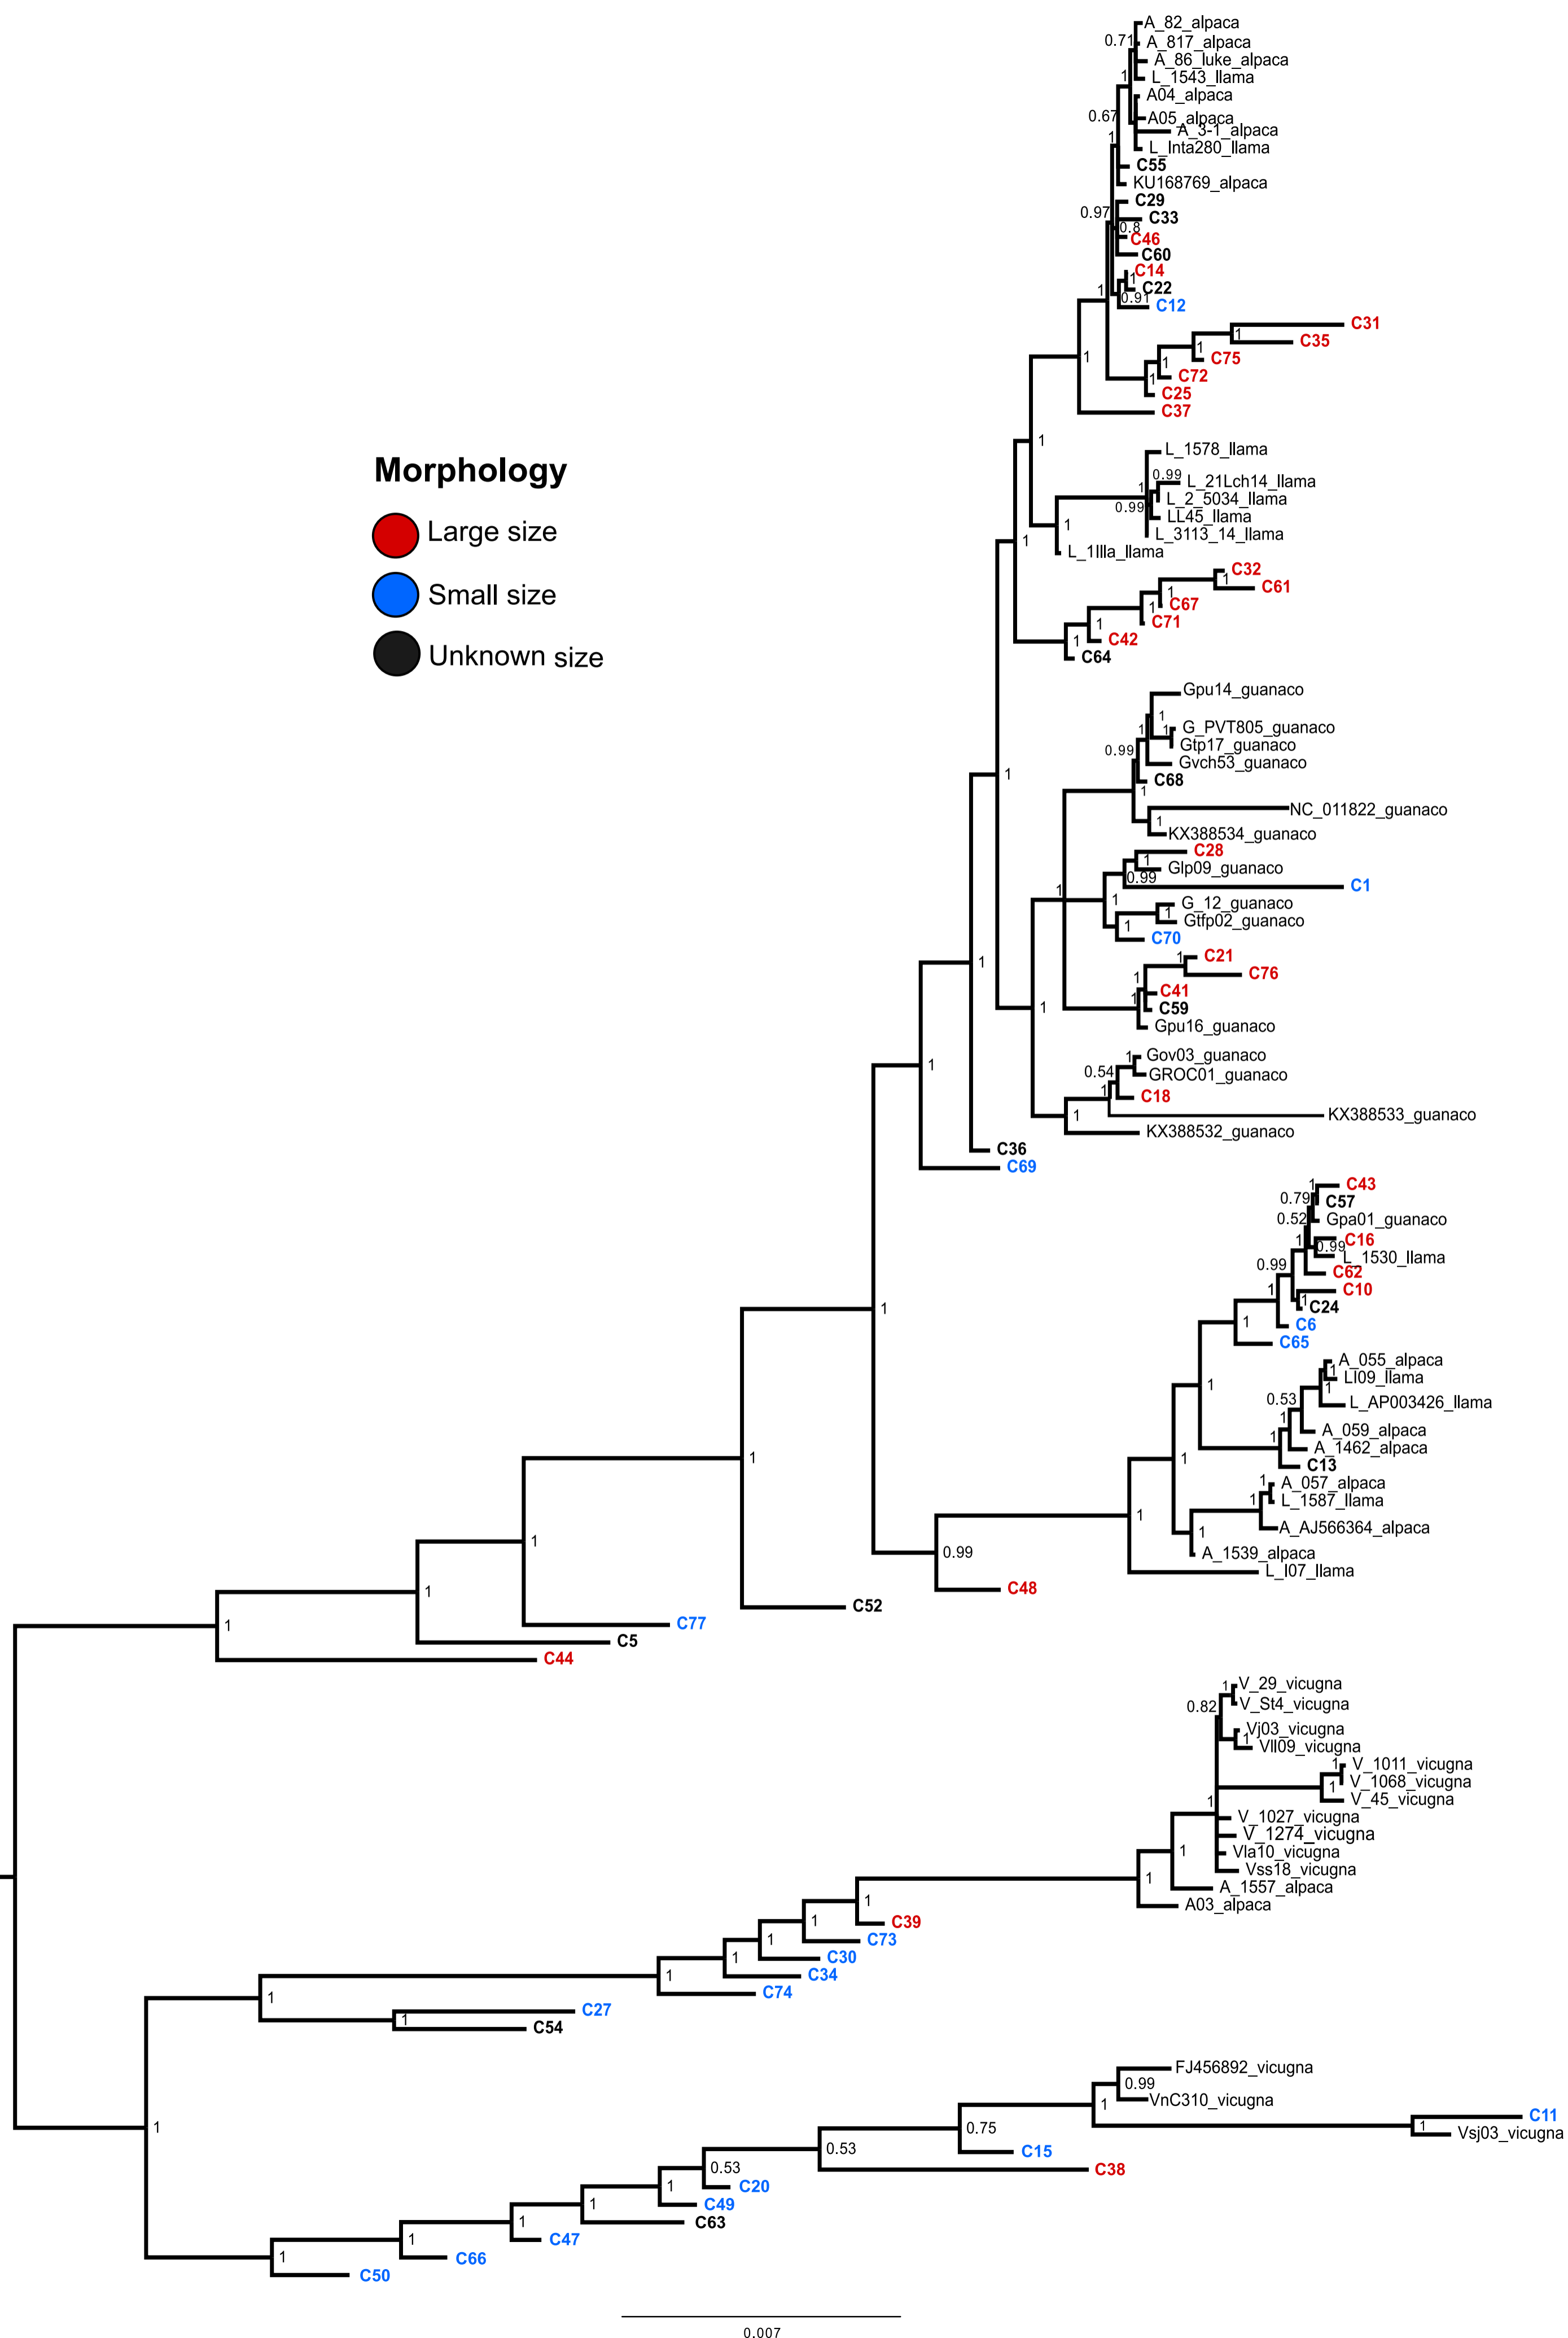

Supplement: supp [file elife_poa_e63390_Figure_3_figure_supplement_2.pdf › elife_poa_e63390_Figure_3_figure_supplement_2.pdf]

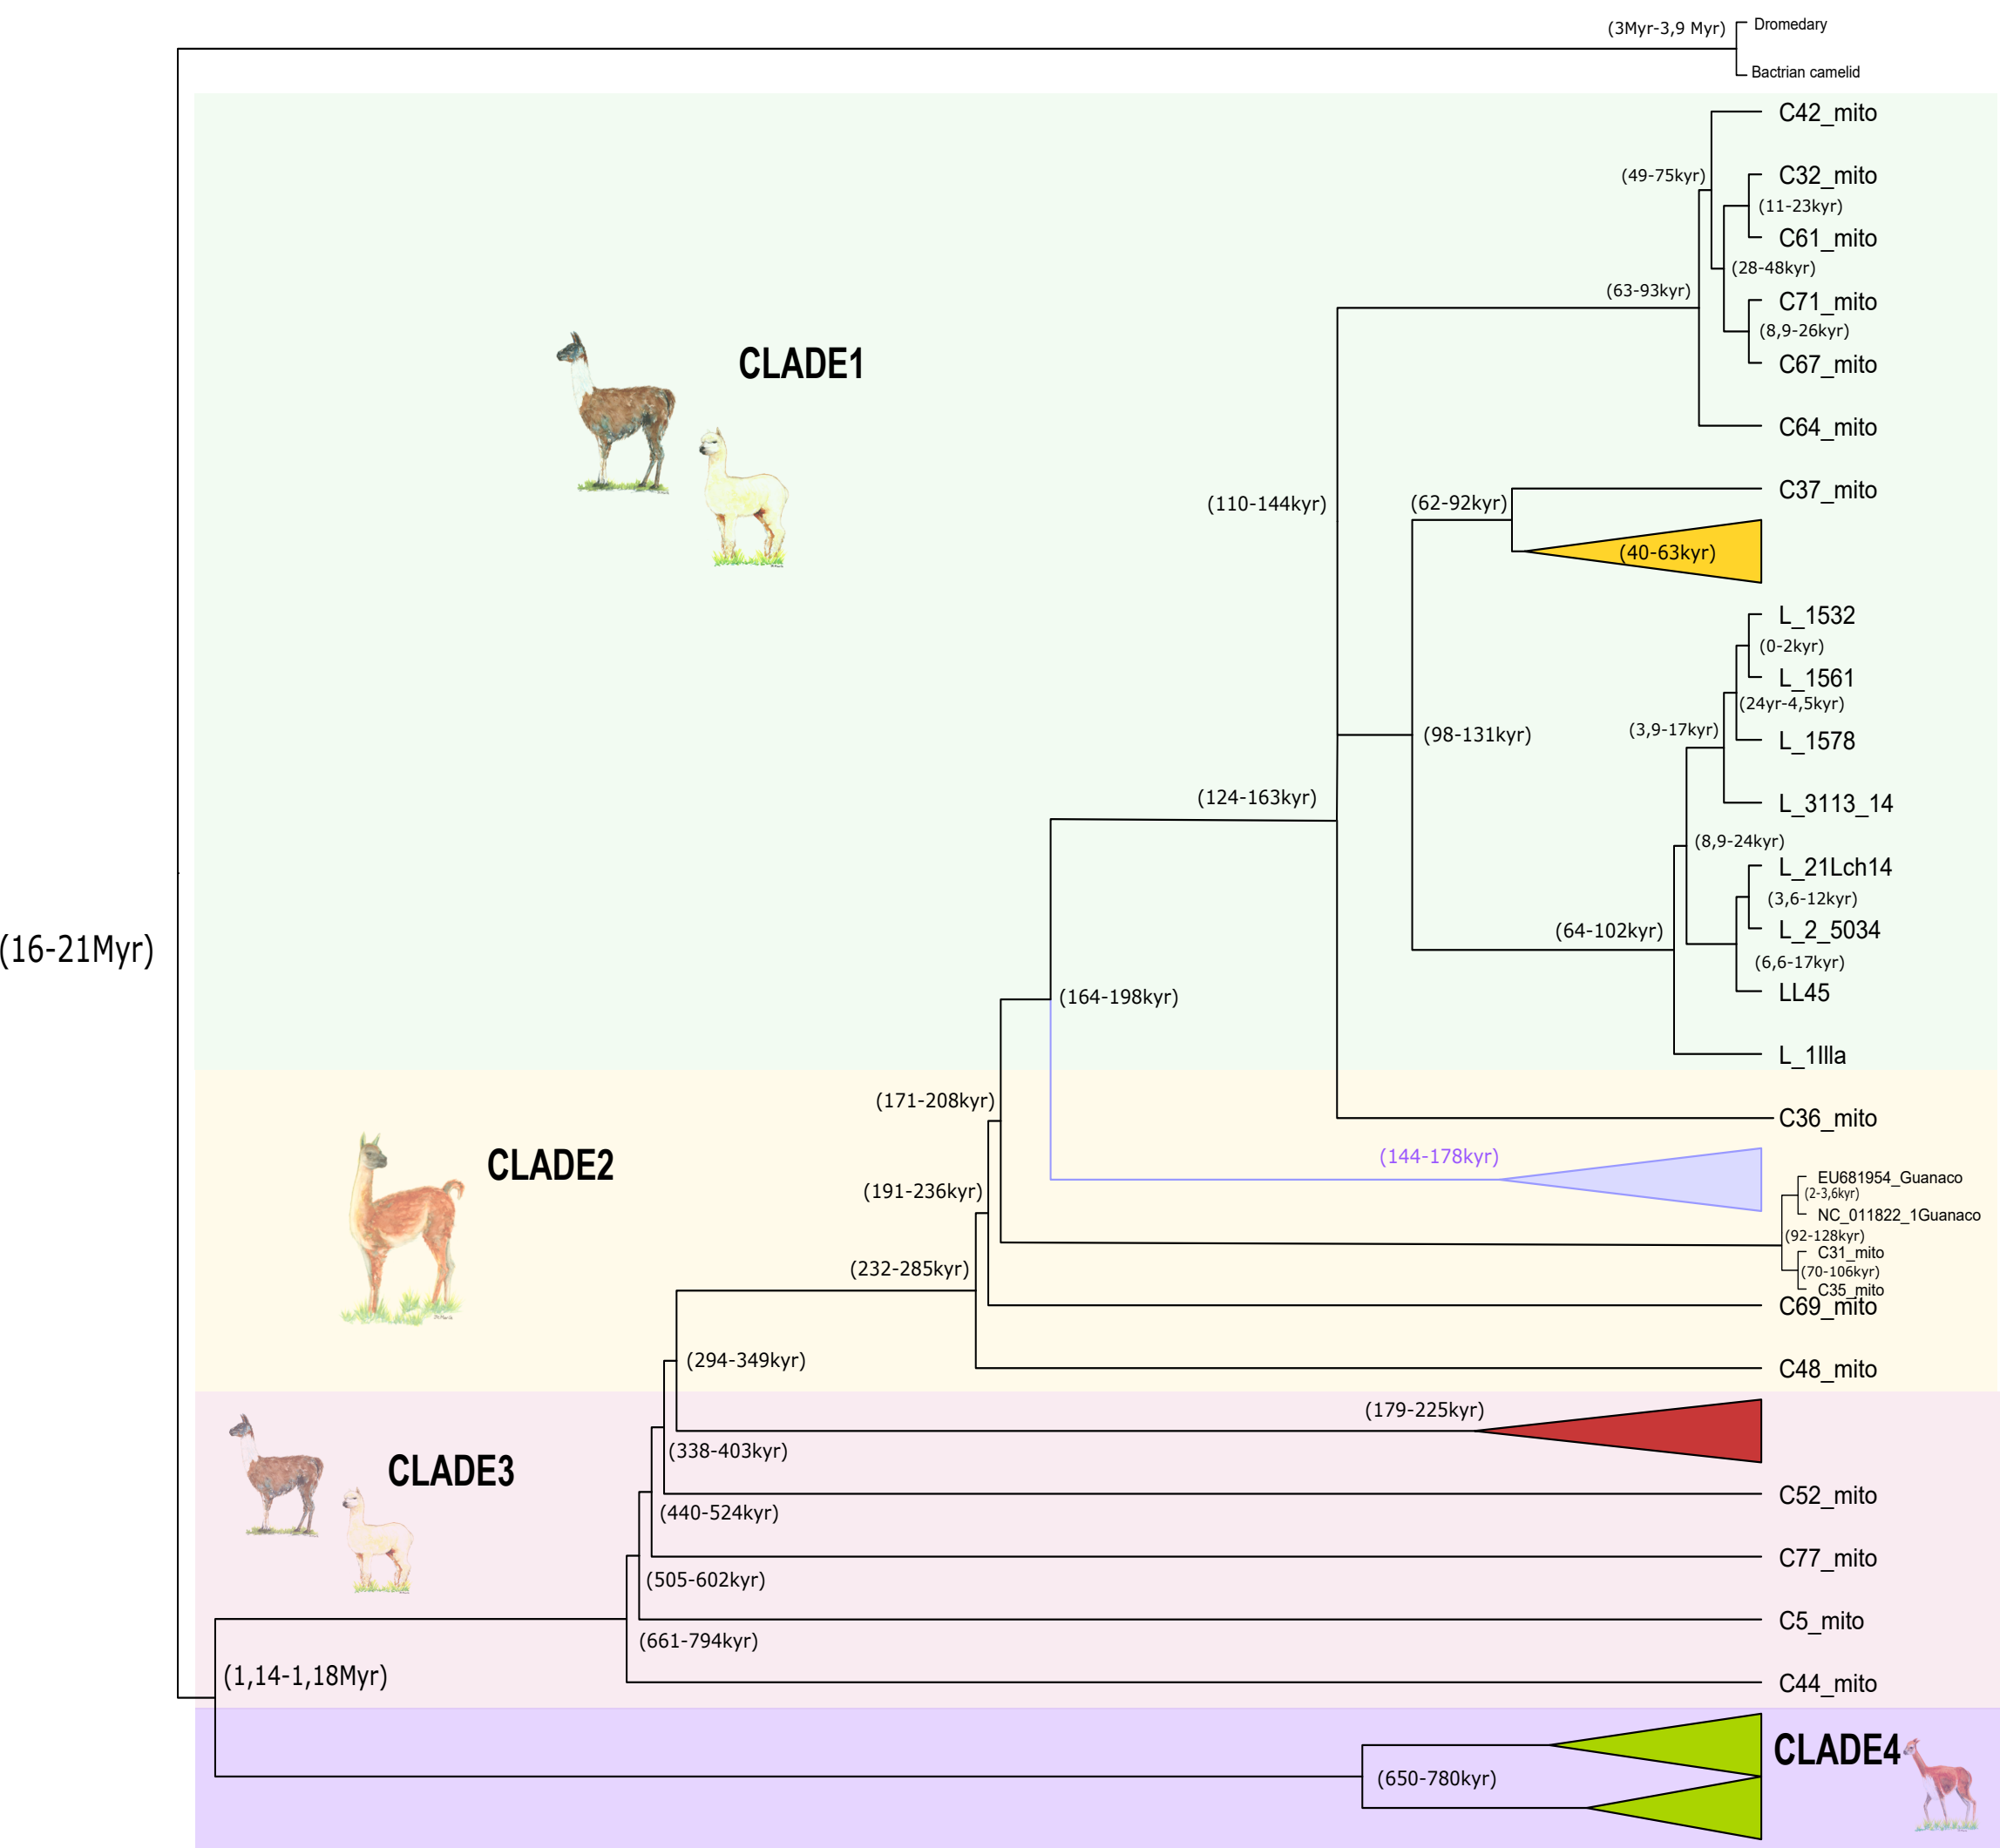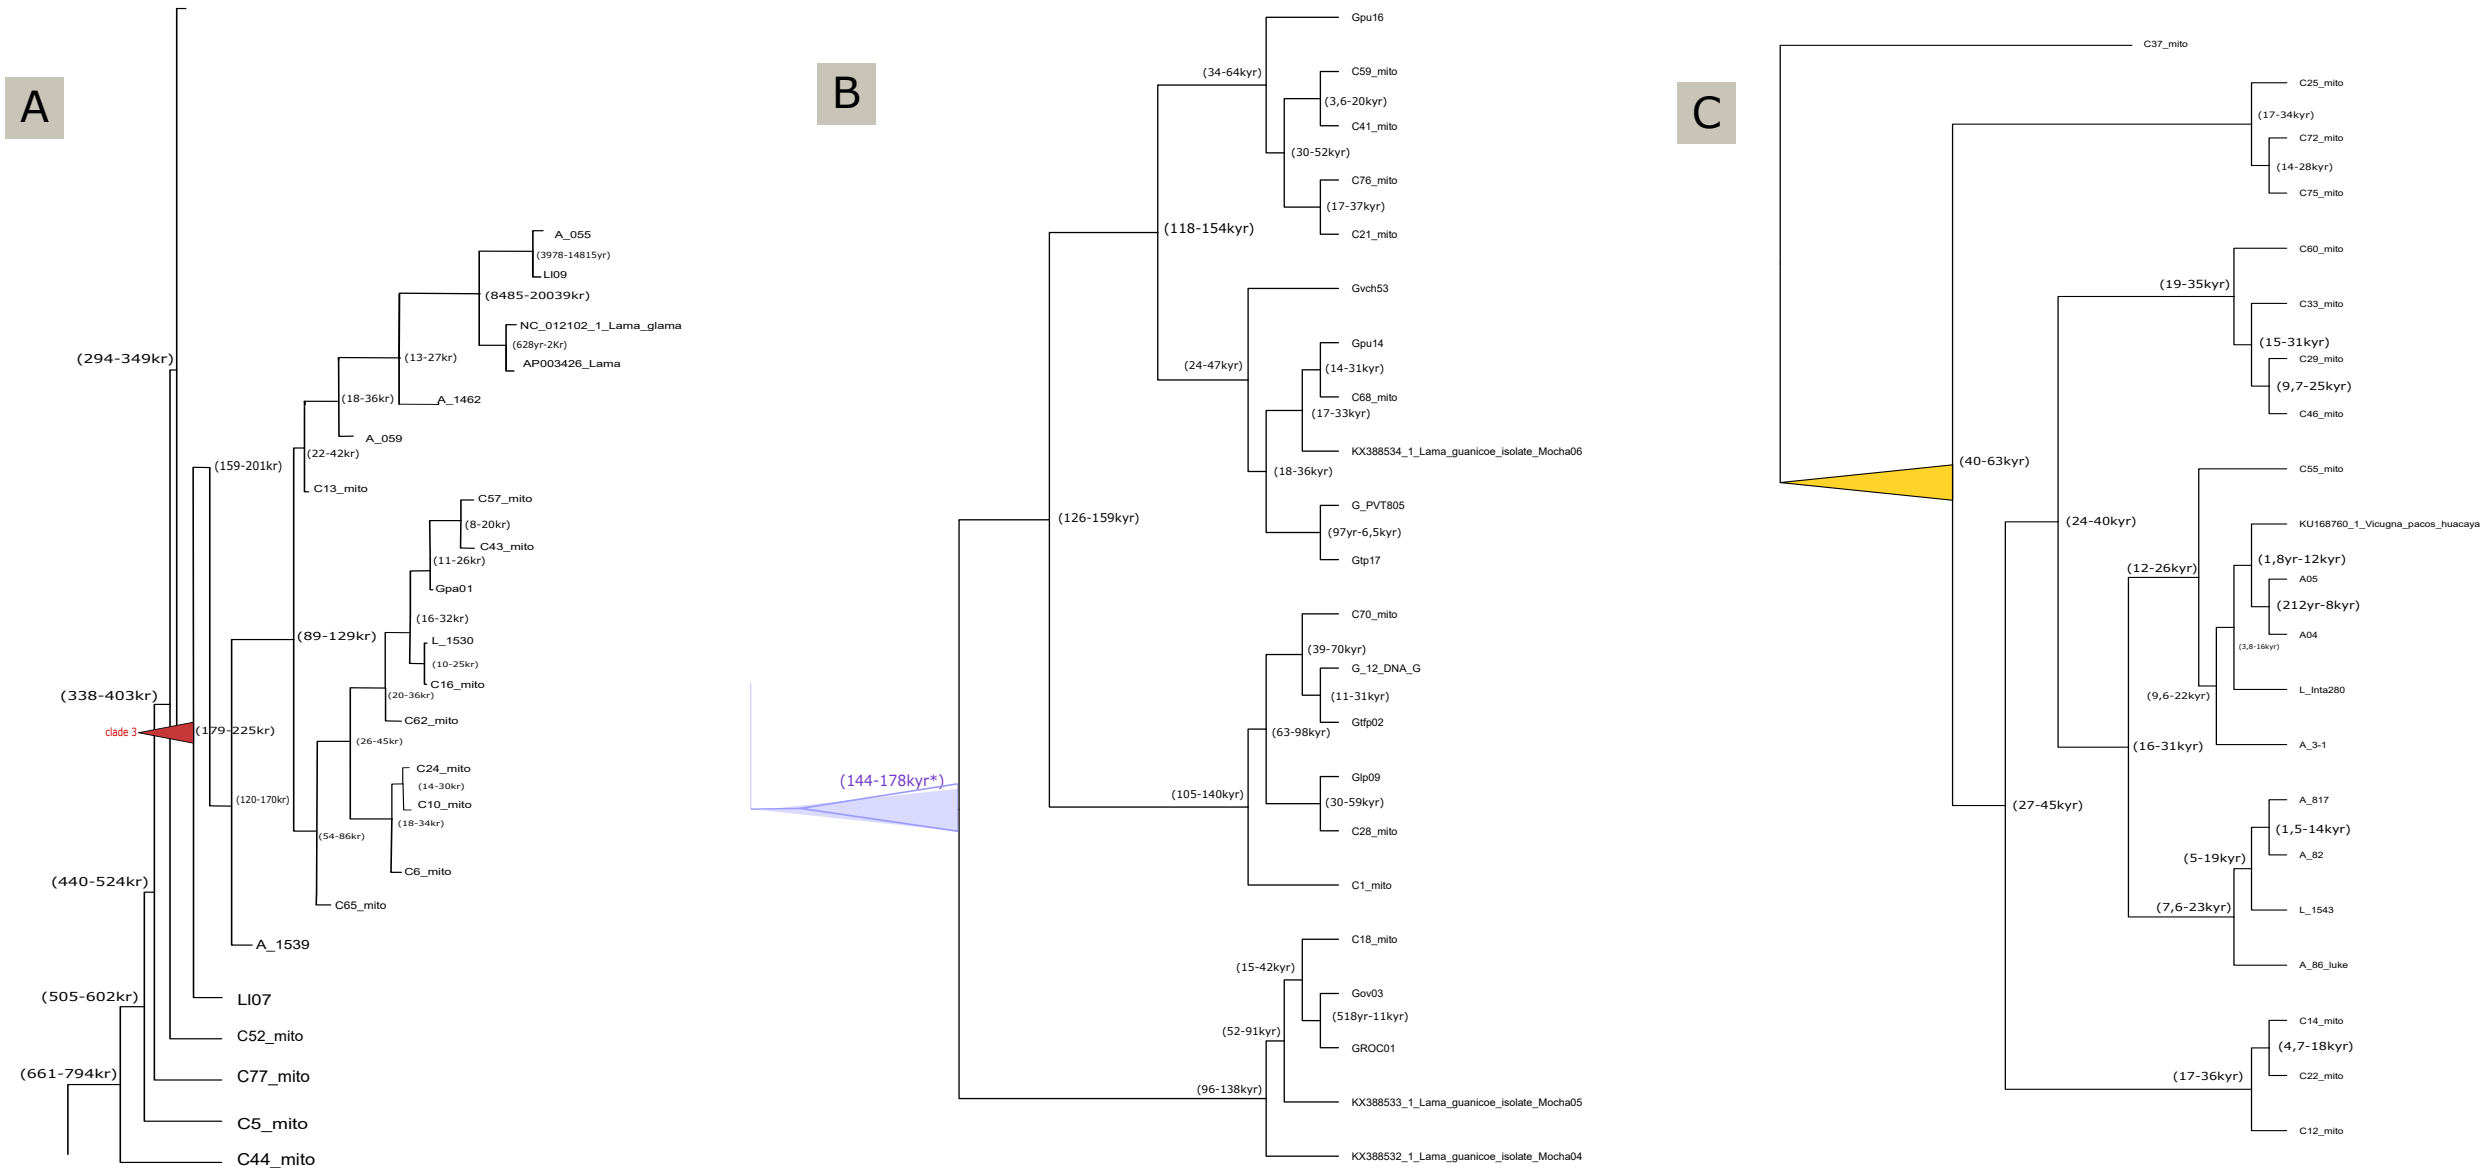

Supplement: supp [file elife_poa_e63390_Figure_3_figure_supplement_3.pdf › elife_poa_e63390_Figure_3_figure_supplement_3.pdf]
